# Supplementary material for: Impact of mismatch-repair deficiency on the colorectal cancer immune microenvironment
Source: PubMed Central journal article supplement (PMC5689628; doi:10.18632/oncotarget.20241), 2017-08-14
Supplement: oncotarget-08-85526-s001.pdf [file oncotarget-08-85526-s001.pdf]

# Impact of mismatch-repair deficiency on the colorectal cancer immune microenvironment

## SUPPLEMENTARY MATERIALS

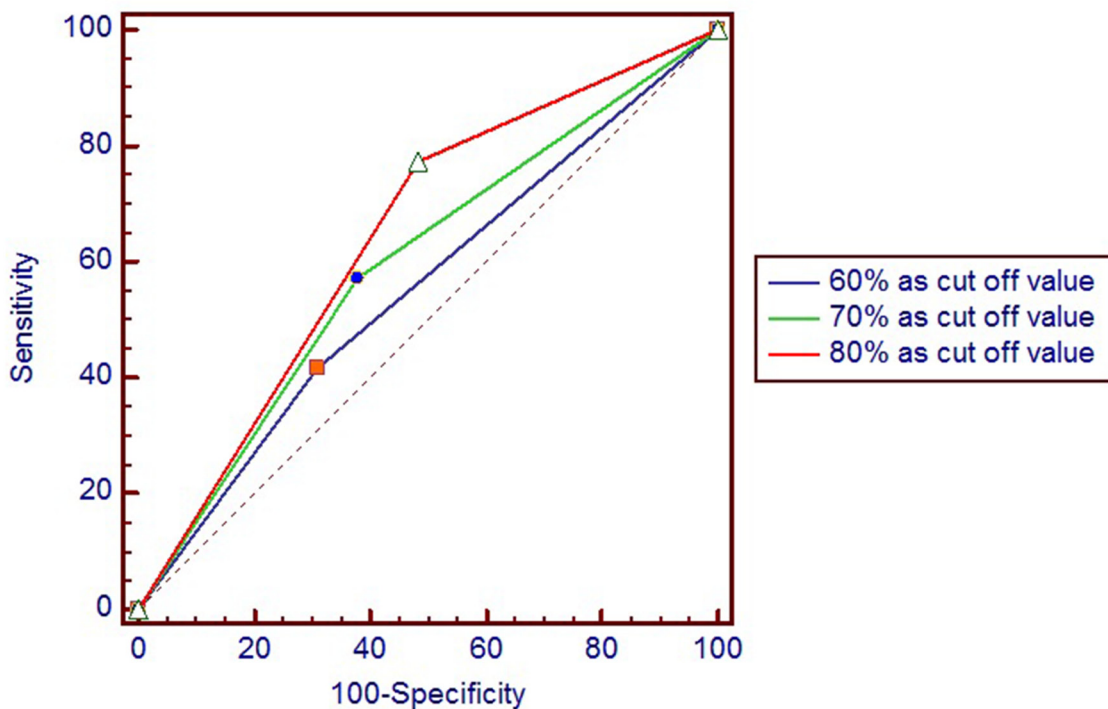

**Supplementary Figure 1: Receiver operating characteristic curve to compare the AUCs with 60%, 70% and 80% positive immune cell infiltrates as cut-off values.** Blue line: 60% as cut-off value, AUC= 0.553; Green line: 70% as cut-off value, AUC=0.596; Red line: 80% as cut-off value, AUC=0.646.
